# Supplementary material for: Tactile modulation of memory and anxiety requires dentate granule cells along the dorsoventral axis
Source: PubMed Central journal article supplement (PMC7695841; doi:10.1038/s41467-020-19874-8), 2020-11-27
Supplement: 41467_2020_19874_MOESM3_ESM.pdf [file 41467_2020_19874_MOESM3_ESM.pdf]

## **Description of Additional Supplementary Files**

**Supplementary Movie 1:** Multimodal enrichment cage setup. Mice are group-housed in a large cage containing a nest box, a running wheel, plastic tubes, Lego bricks, and Nestlets.

**Supplementary Movie 2:** Tactile enrichment cage setup. A singly housed mouse is exploring a standard-sized cage provided with a bead curtain and Nestlets.
